# Supplementary material
Source: PubMed Central journal article supplement (PMC3958132)
Supplement: ac403796n_si_001.pdf [file ac403796n_si_001.pdf]

**Supplemental Material for 193 nm Ultraviolet Photodissociation Mass Spectrometry for  
the Structural Elucidation of Lipid A Compounds in Complex Mixtures**

*John P. O'Brien<sup>1</sup>, Brittany D. Needham<sup>2</sup>, Jeremy C. Henderson<sup>2</sup>, Emily M. Nowicki<sup>2</sup>, M. Stephen  
Trent<sup>2</sup> and Jennifer S. Brodbelt<sup>1\*</sup>*

<sup>1</sup>Department of Chemistry  
The University of Texas at Austin  
1 University Station A5300  
Austin, TX, USA 78712

<sup>2</sup>The University of Texas at Austin  
Department of Molecular Biosciences  
2506 Speedway A5000

Figure S-1. MS/MS mass spectra of singly deprotonated wild type *E. coli* lipid A ( $M_r = 1797.2$ ) using (A) CID, (B) HCD and (C) UVPD. Glucosamine fragment ions are labeled as “ring cleavages”.

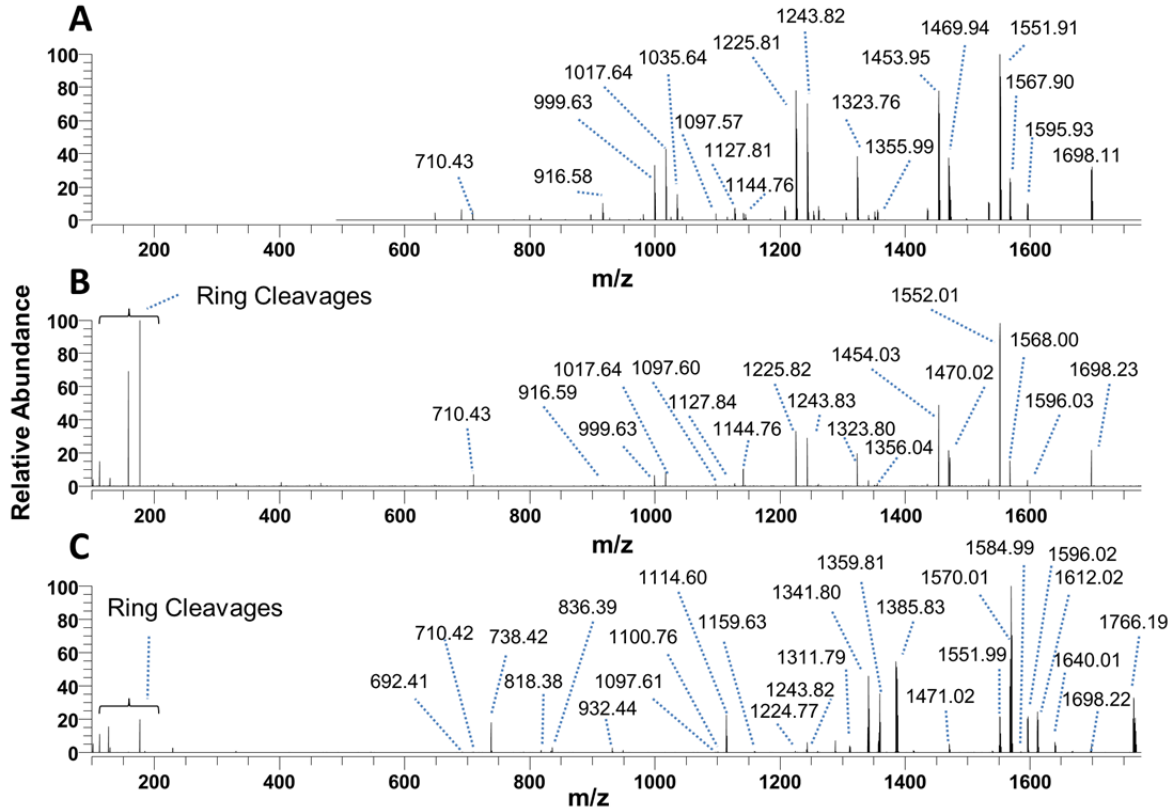

Figure S-2. MS/MS fragmentation maps of singly deprotonated wild type *E. coli* lipid A ( $M_r = 1797.2$ ) using (A) CID (B) HCD and (C) UVPD. Each cleavage site is numbered, and the  $m/z$  values of the fragment ions arising from each cleavage site are listed. Those fragment ions that require multiple cleavages are listed next to each cleavage site. Cleavages marked in red font are unique to UVPD.

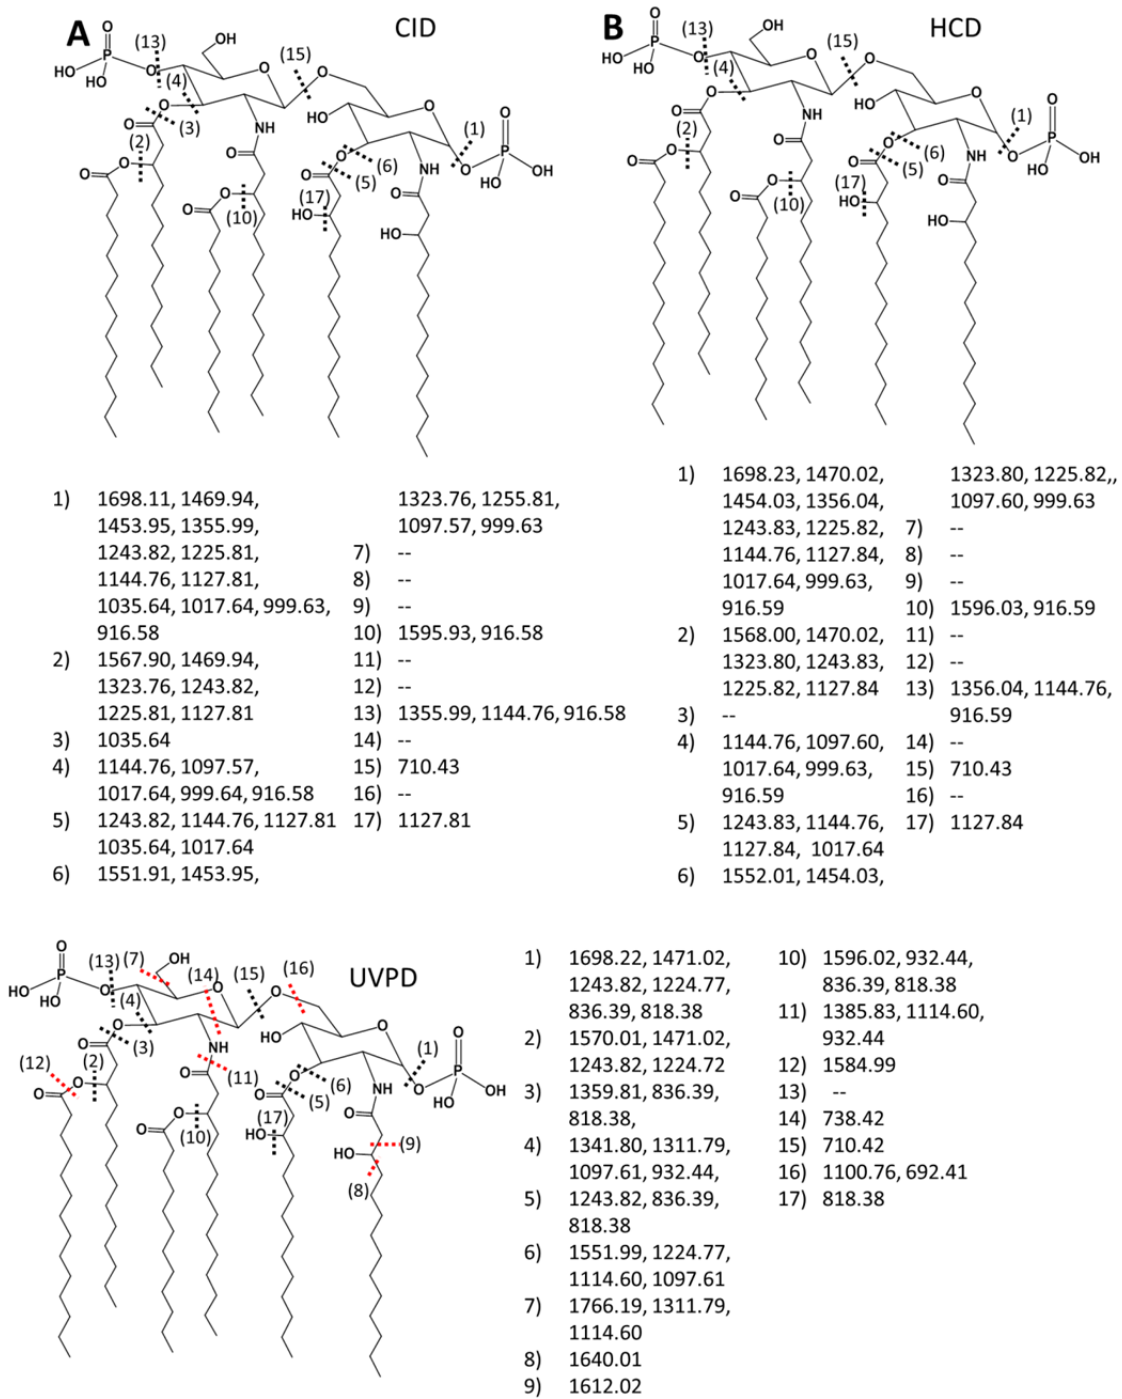

Figure S-3. MS/MS mass spectra of doubly deprotonated *V. cholerae* lipid A ( $M_r = 1757.2$  Da) using (A) CID, (B) HCD (C) UVPD. Glucosamine fragment ions are labeled as “ring cleavages”.

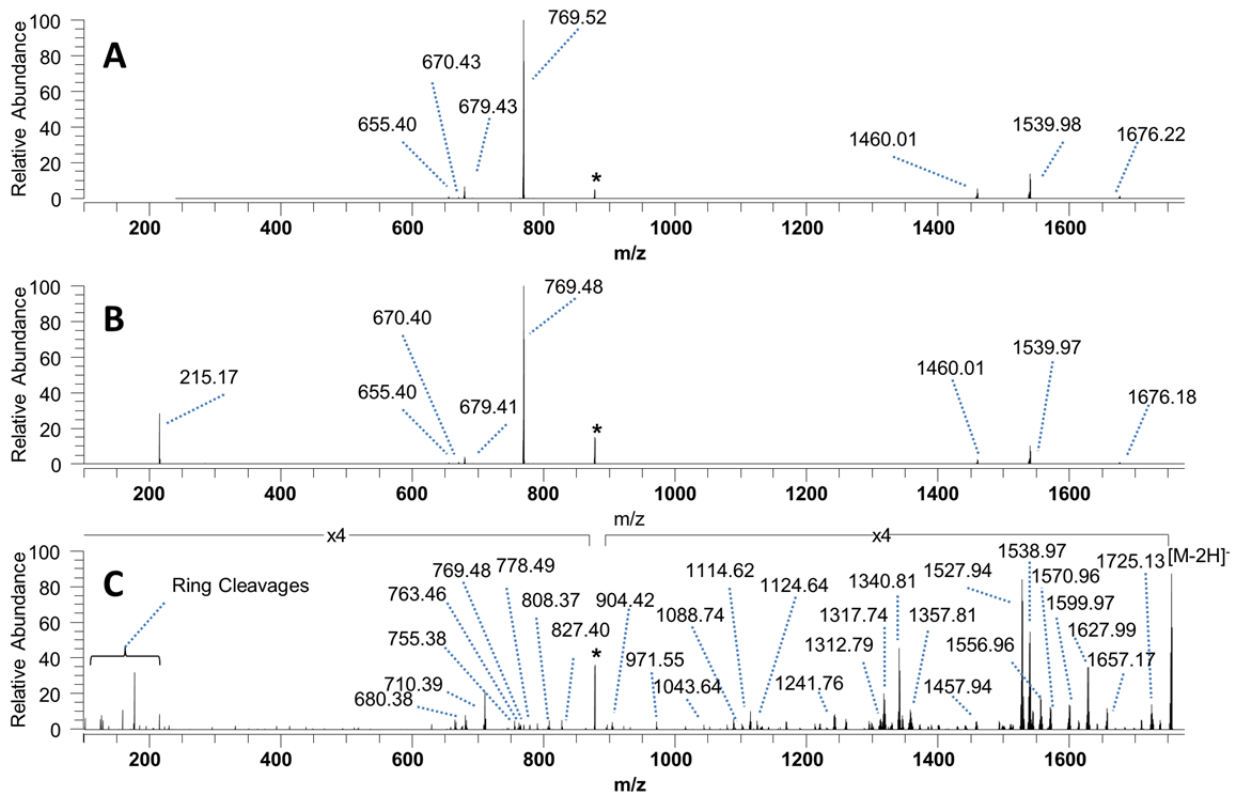

Figure S-4. MS/MS mass spectra of singly deprotonated *V. Cholerae* lipid A ( $M_r = 1757.2$  Da) using (A) CID, (B) HCD (C) UVPD. Glucosamine fragment ions are labeled as “ring cleavages”.

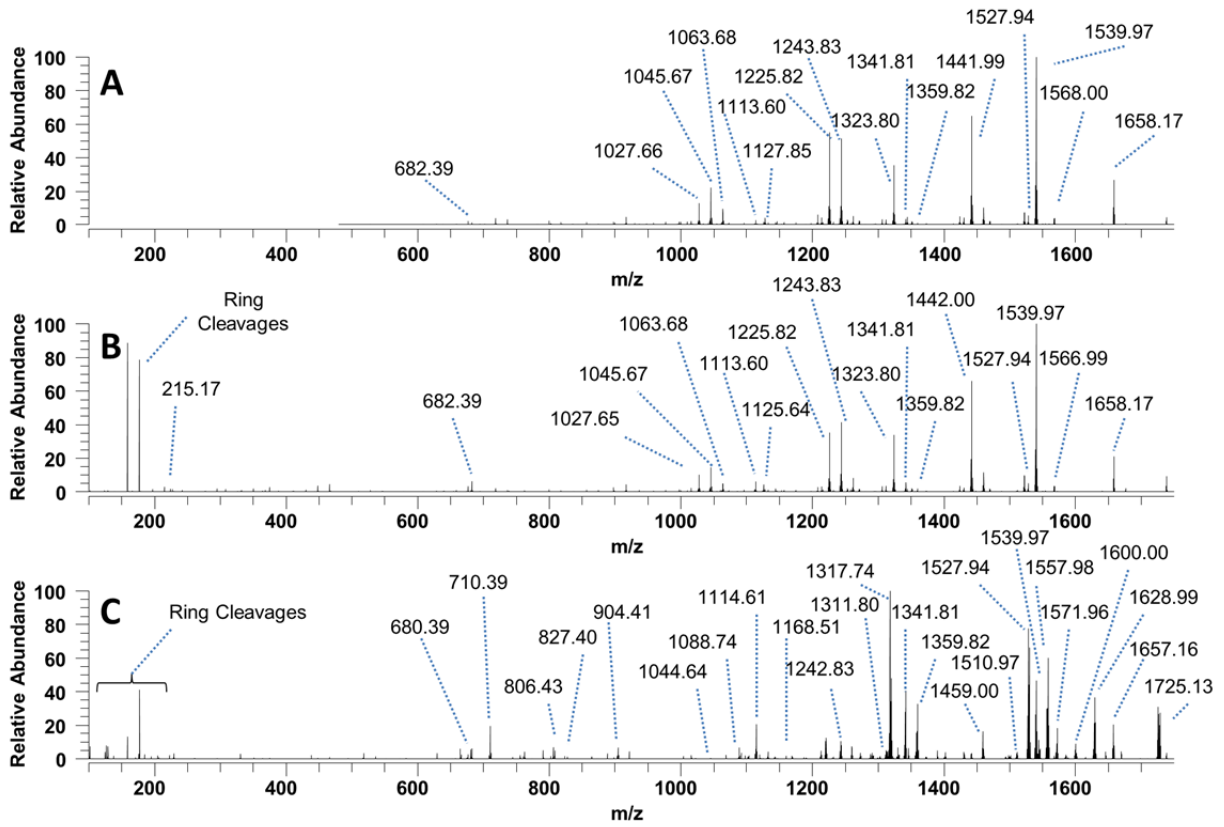

Figure S-5. MS/MS mass spectra of doubly deprotonated *P. aeruginosa* lipid A ( $M_r = 1617.00$  Da) using (A) CID, (B) HCD (C) UVPD. Glucosamine fragment ions are labeled as “ring cleavages”.

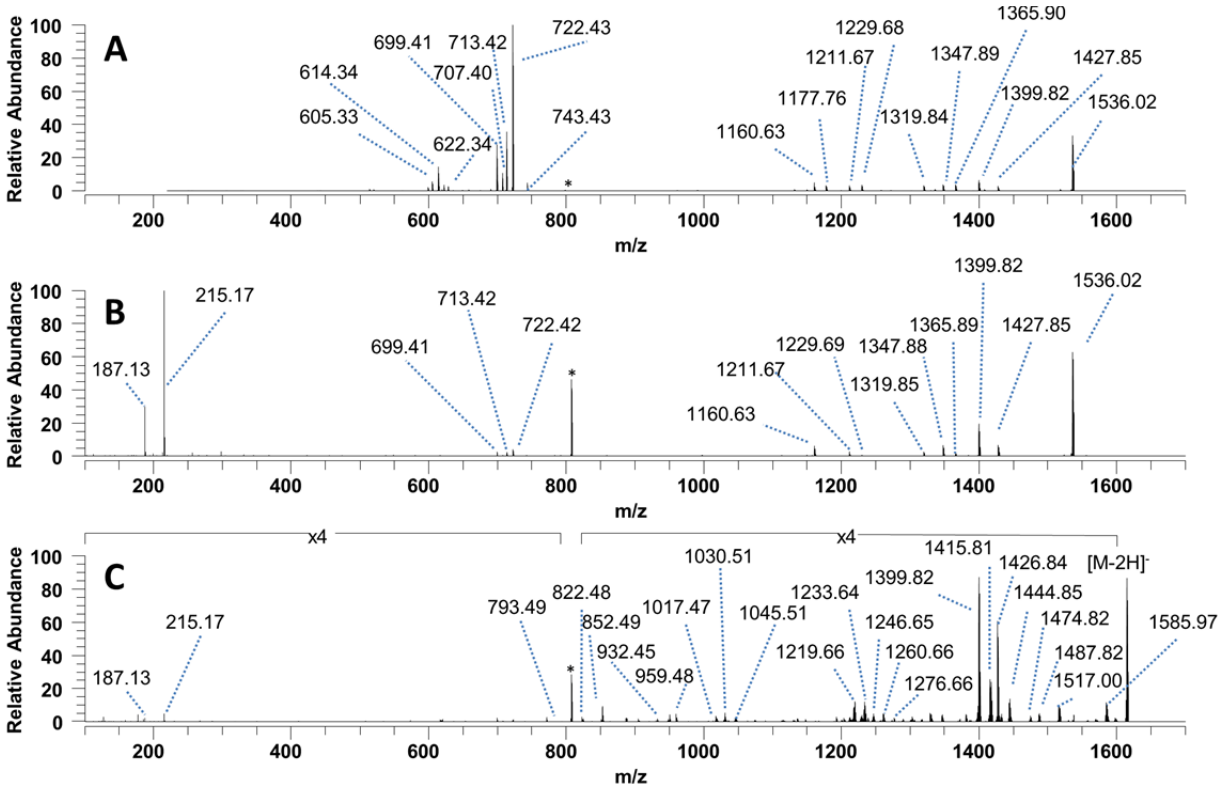

Figure S-6. MS/MS mass spectra of singly deprotonated *P. aeruginosa* lipid A ( $M_r = 1617.00$  Da) using (A) CID, (B) HCD (C) UVPD. Glucosamine fragment ions are labeled as “ring cleavages”.

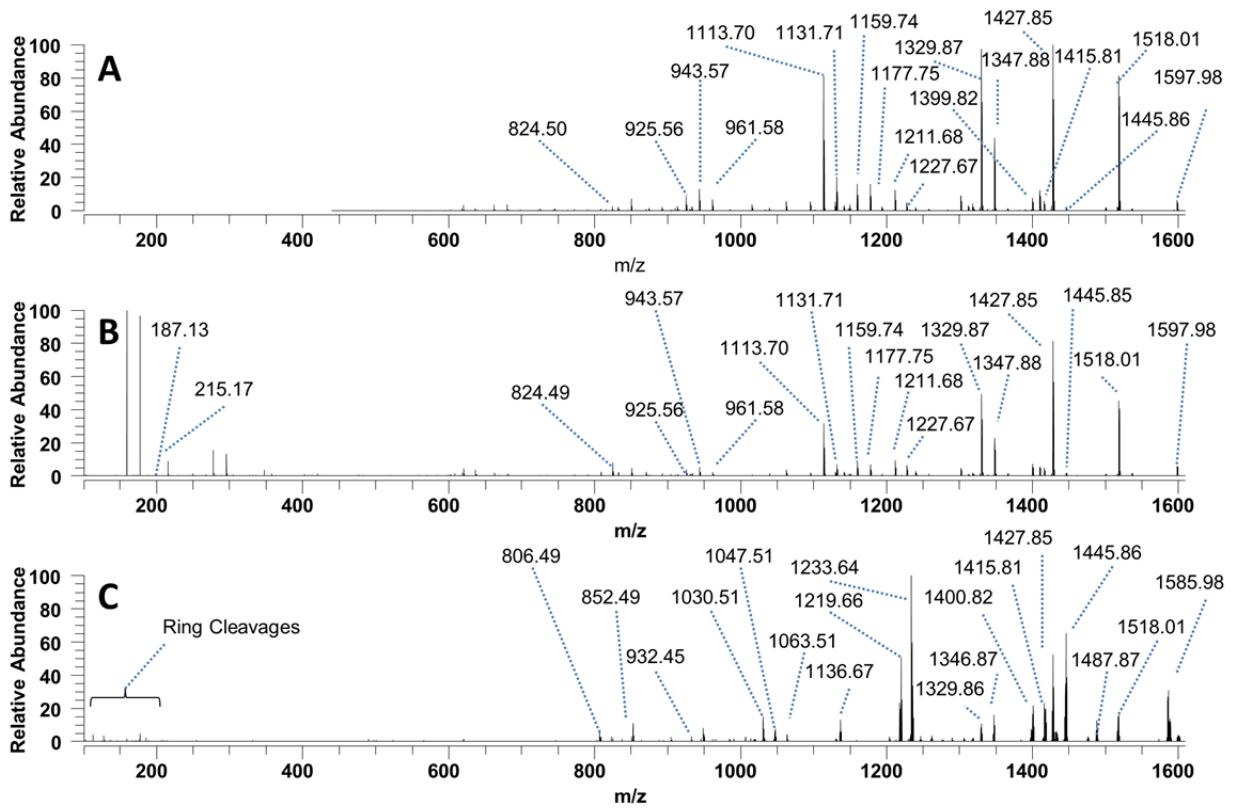

Figure S-7. MS/MS fragmentation maps of doubly deprotonated *V. cholerae* lipid A ( $M_r = 1757.2$  Da) using (A) CID, (B) HCD, and (C) UVPD. Each cleavage site is numbered, and the  $m/z$  values of the fragment ions arising from each cleavage site are listed. Those fragment ions that require multiple cleavages are listed next to each cleavage site. Cleavages marked in red font are unique to UVPD.

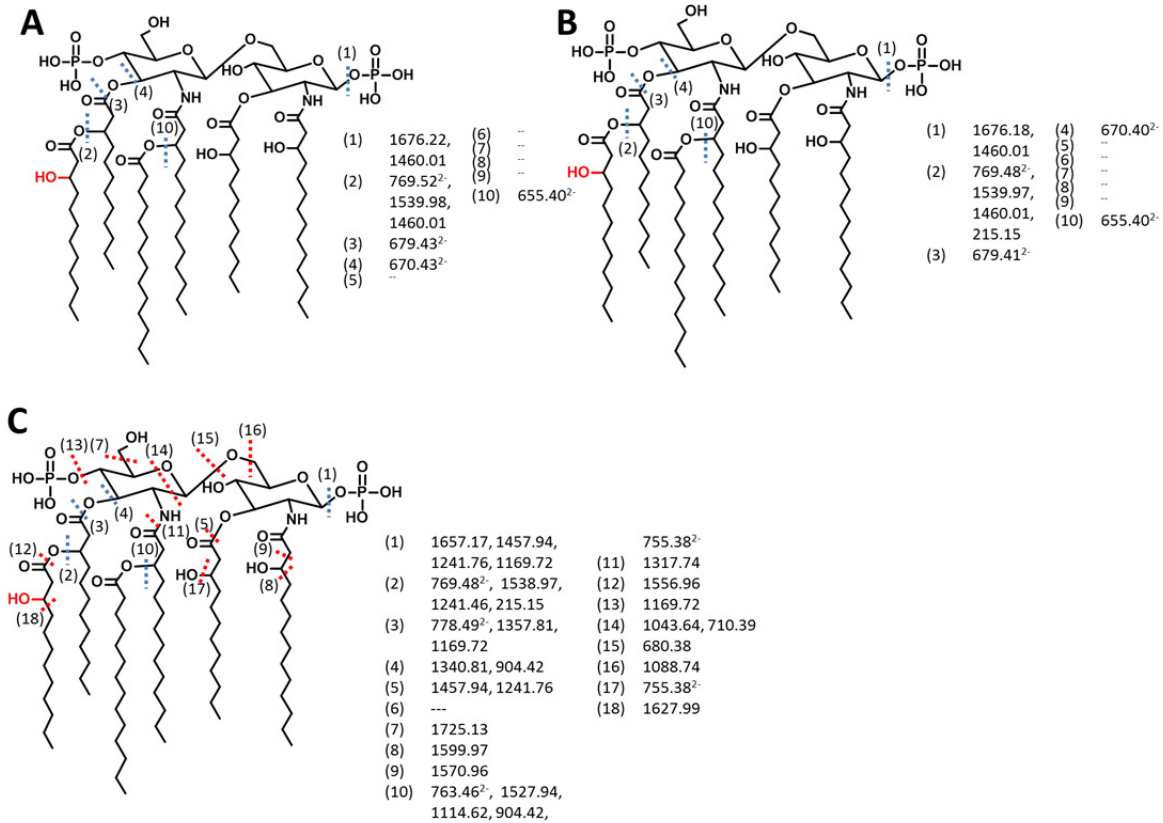



Figure S-8. MS/MS fragmentation maps of singly deprotonated *V. Cholerae* lipid A ( $M_r = 1757.2$  Da) using (A) CID, (B) HCD, and (C) UVPD. Each cleavage site is numbered, and the  $m/z$  values of the fragment ions arising from each cleavage site are listed. Those fragment ions that require multiple cleavages are listed next to each cleavage site. Cleavages marked in red font are unique to UVPD.

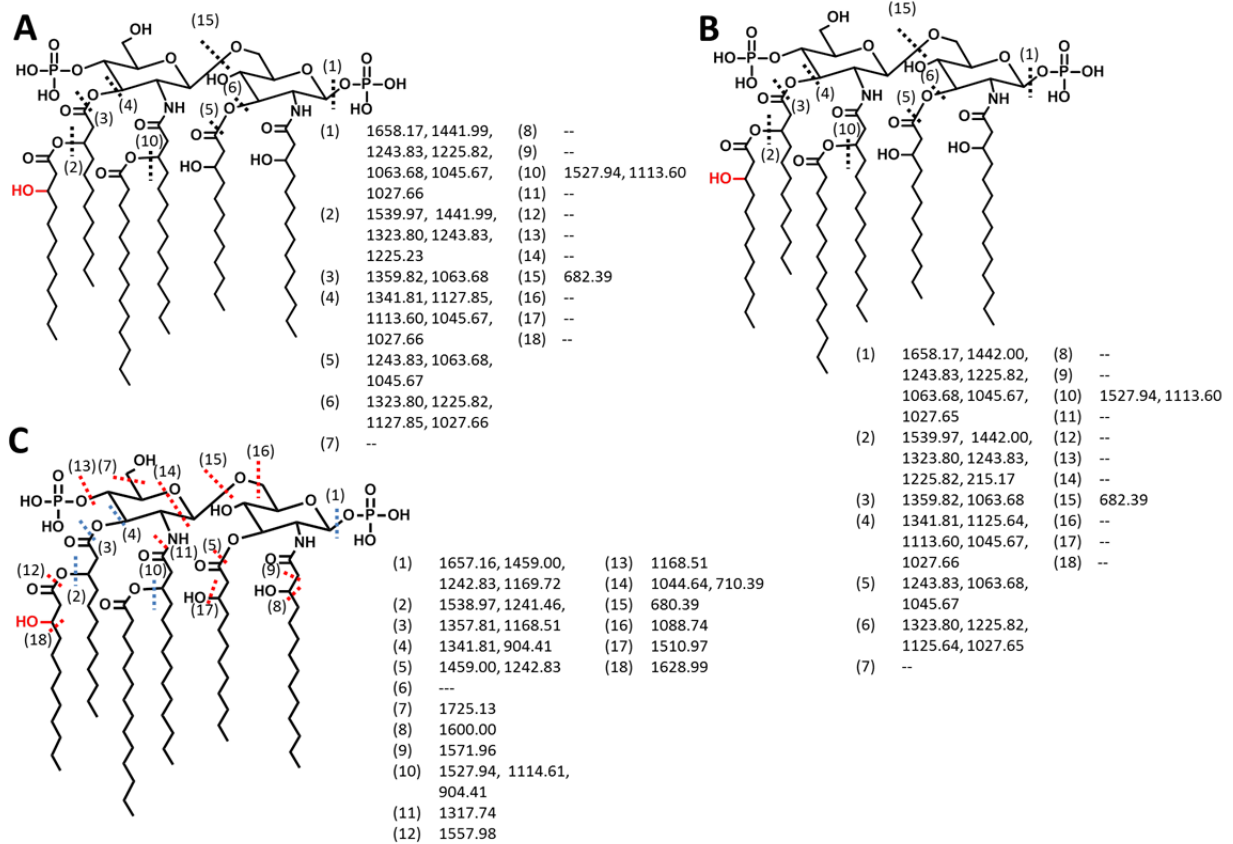

Figure S-9. MS/MS fragmentation maps of doubly deprotonated *P. aeruginosa* lipid A ( $M_r = 1617.00$  Da Da) using (A) CID, (B) HCD, and (C) UVPD-MS. Each cleavage site is numbered, and the  $m/z$  values of the fragment ions arising from each cleavage site are listed. Those fragment ions that require multiple cleavages are listed next to each cleavage site. Cleavages marked in red font are unique to UVPD.

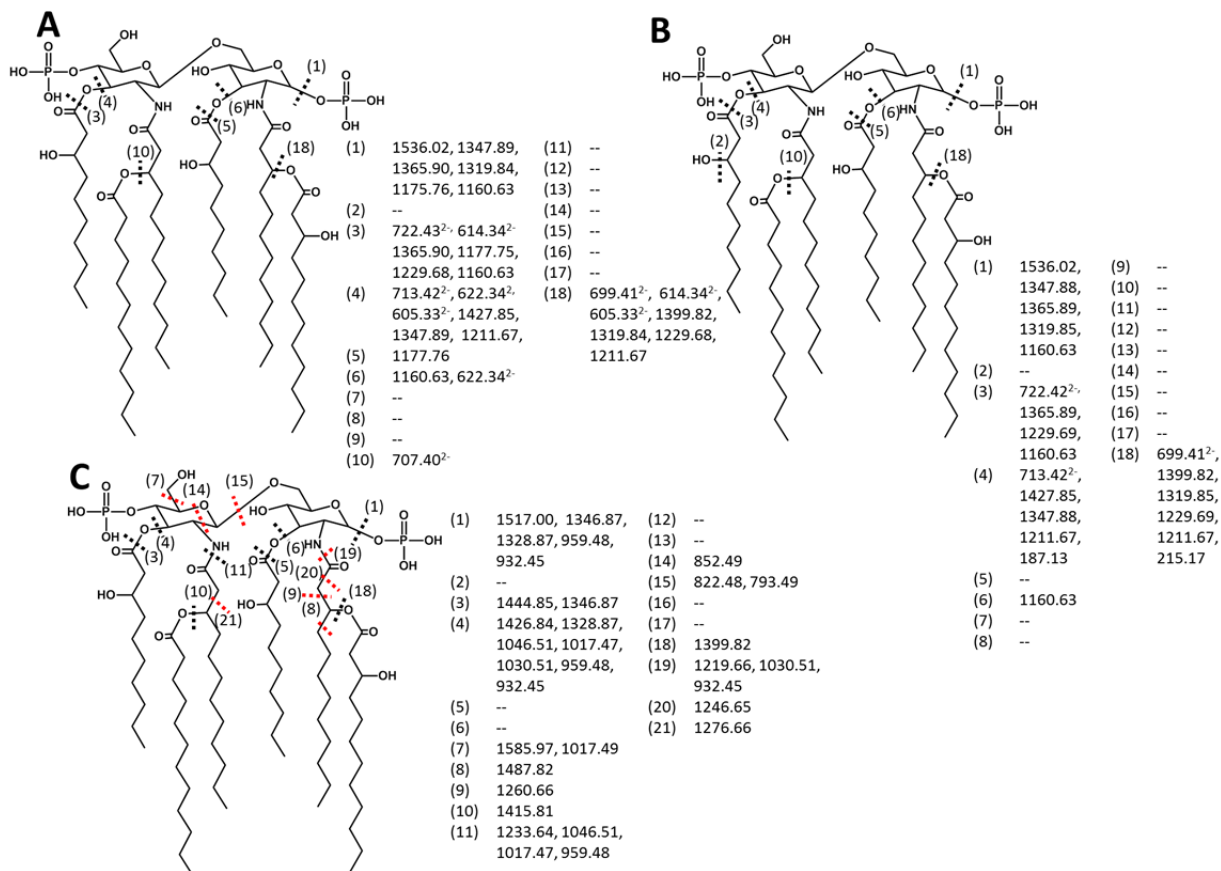

Figure S-10. MS/MS fragmentation maps of singly deprotonated *P. aeruginosa* lipid A ( $M_r = 1617.00$  Da Da) using (A) CID, (B) HCD, and (C) UVPD. Each cleavage site is numbered, and the  $m/z$  values of the fragment ions arising from each cleavage site are listed. Those fragment ions that require multiple cleavages are listed next to each cleavage site. Cleavages marked in red font are unique to UVPD.

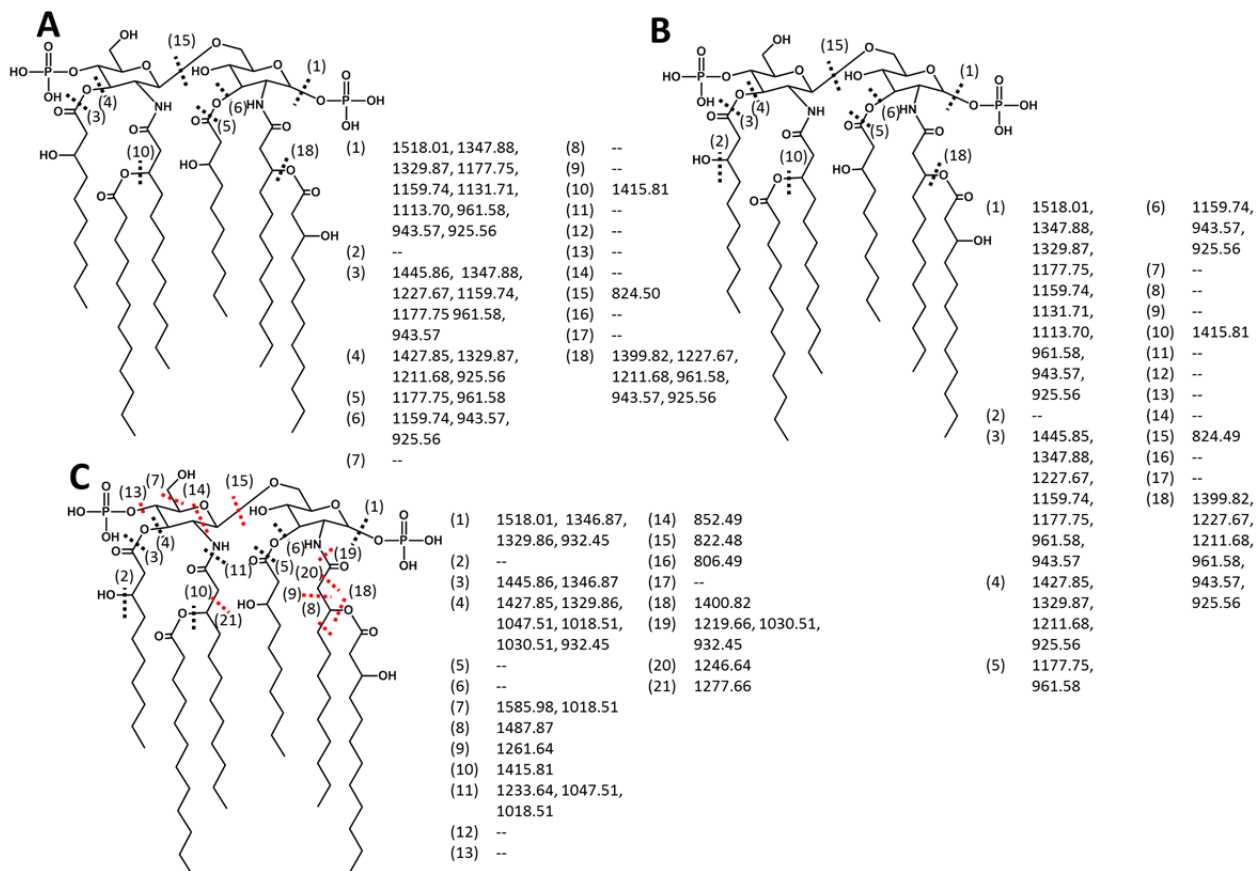

Figure S-11. Extracted ion chromatograms (EIC) of the major lipid A species observed upon combinatorial modification of BN2 expressed in the presence of the active enzymes LpxF, PagL and PagP. Each EIC is aligned with the corresponding schematic structure.

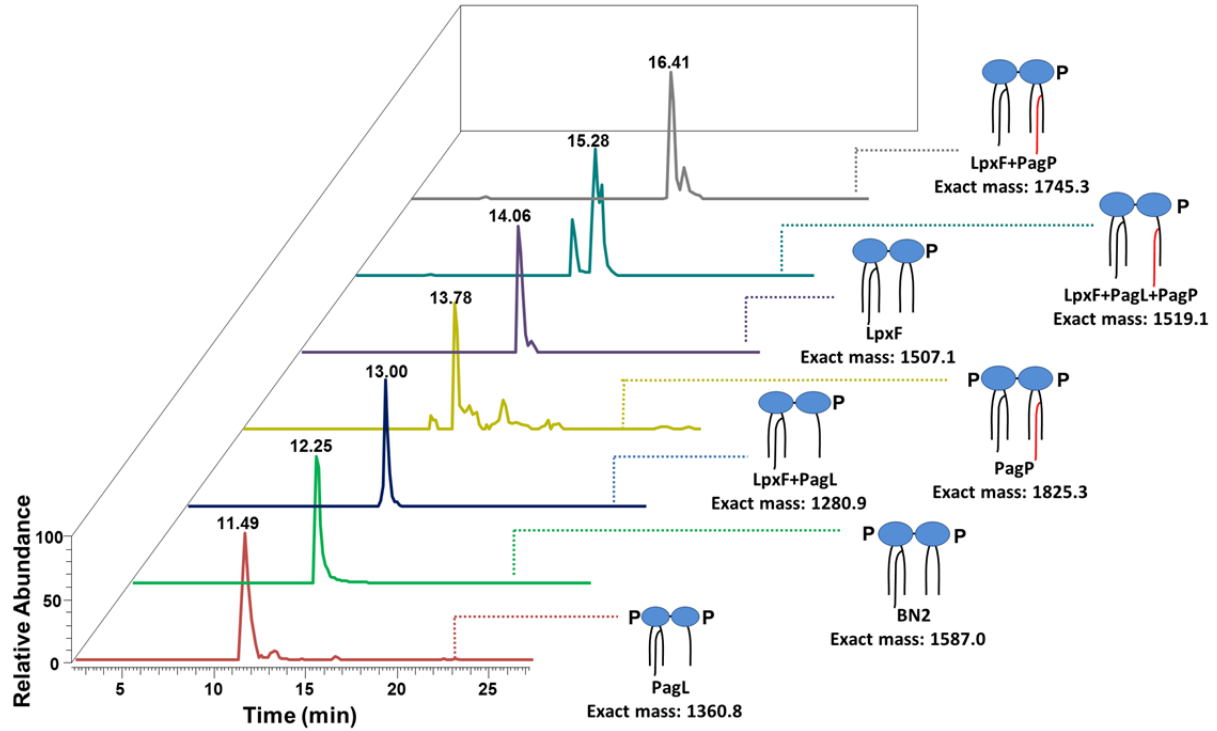

Figure S-12. Survey ESI mass spectra of the major lipid A species observed upon combinatorial modification of BN2 expressed in the presence of the active enzymes LpxE, PagL and PagP.

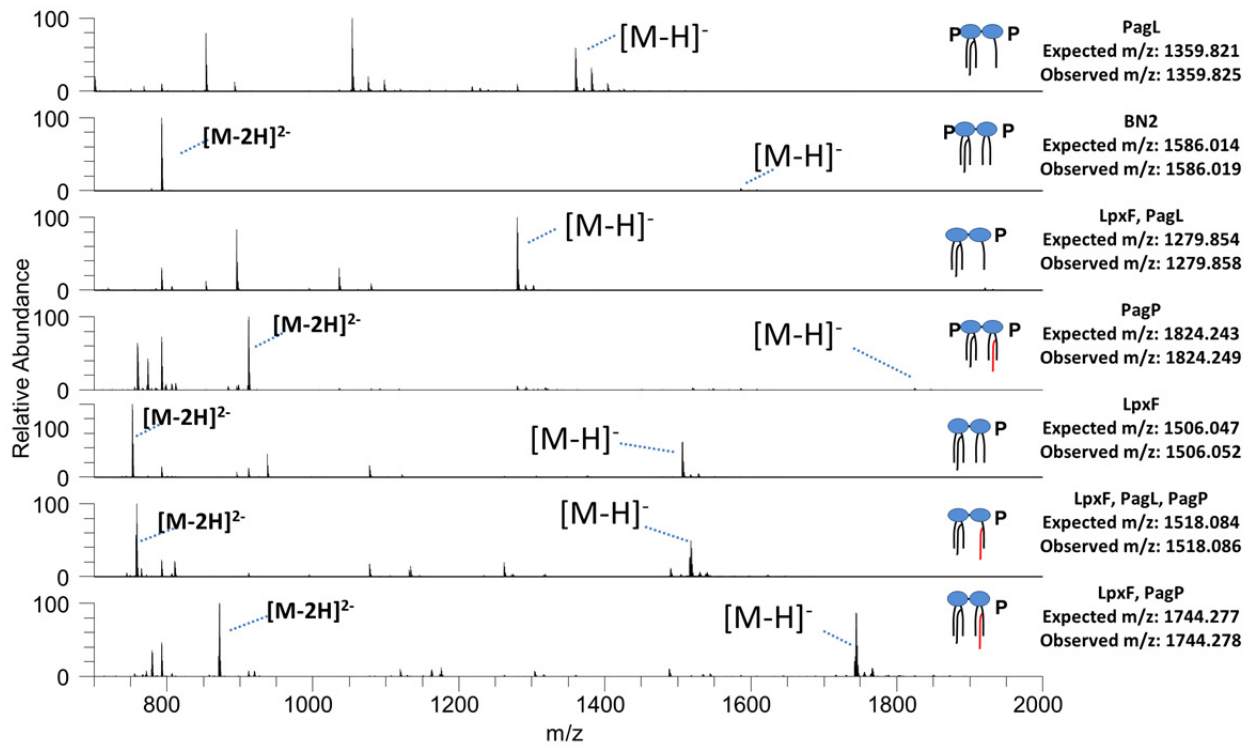

Figure S-13 Cleavage site histograms for doubly and singly deprotonated *E. coli* BN2 lipid ( $M_r = 1587.0$  Da) using (A) CID, and (B) UVPD. Black bars represent fragment ions from the doubly deprotonated precursor. Blue bars represent fragments from the singly deprotonated precursor. Relative frequencies for all cleavage sites were calculated using equation 1. The numbers representing the cleavage sites are shown in the structure.

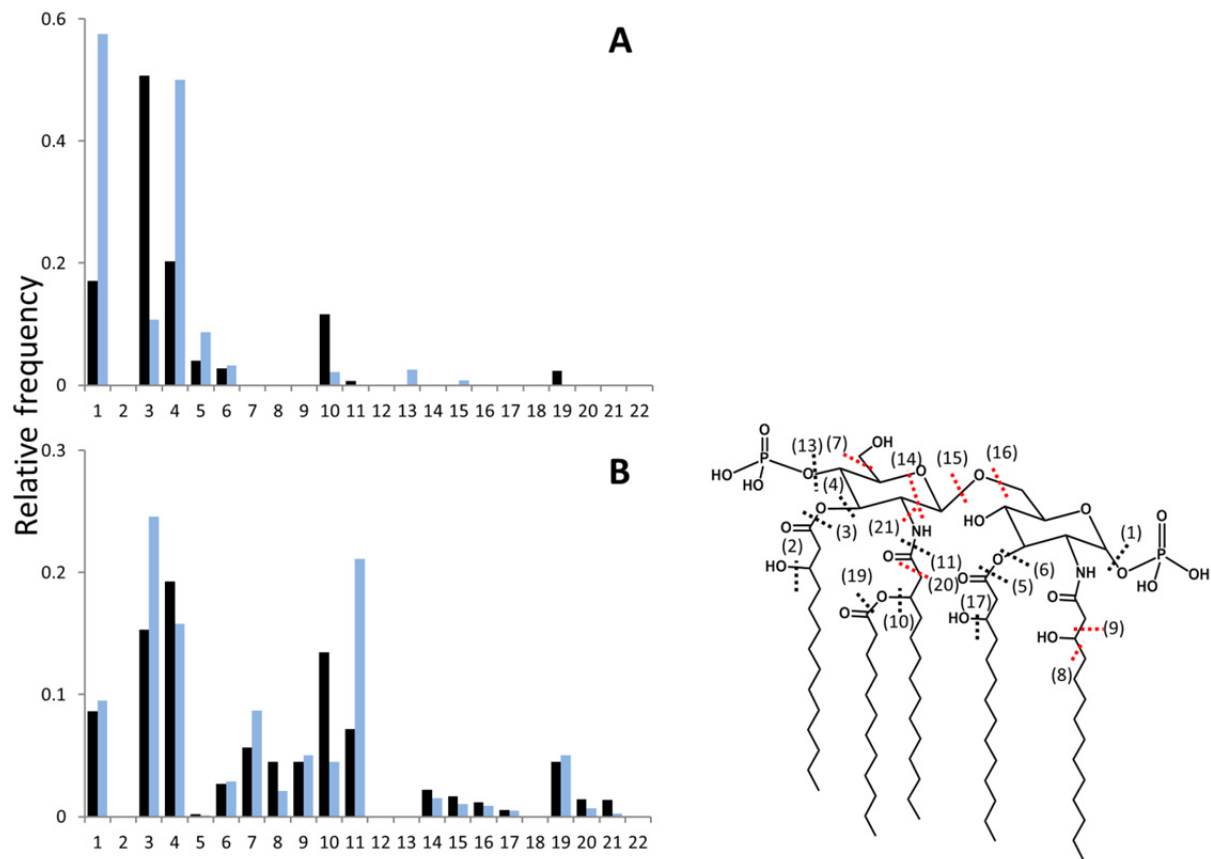

Figure S-14. The following compilation of spectra and fragmentation maps were used in the identification of BN2 pFLP lipid A species shown in Figure 5.

MS/MS mass spectra of doubly deprotonated penta-acylated BN2 *E. coli* lipid A ( $M_r = 1587.0$  Da) using (A) CID or (B) UVPD. Glucosamine fragment ions are labeled as “ring cleavages”.

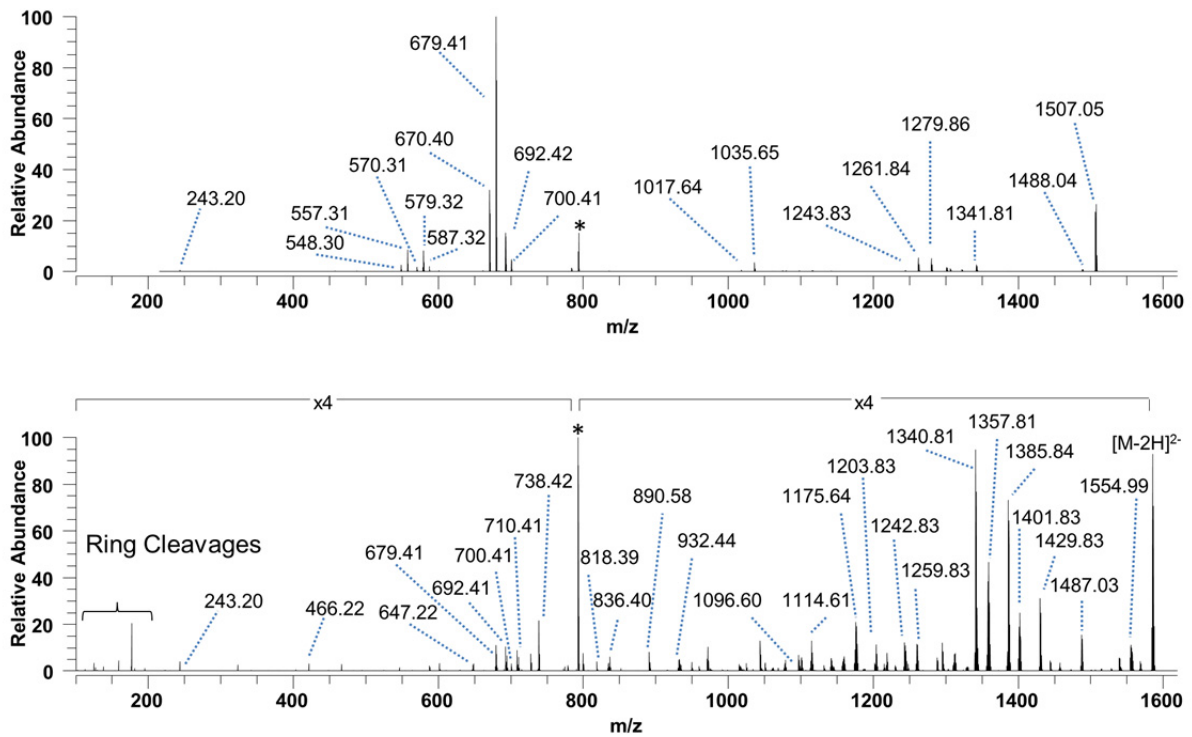

MS/MS mass spectra of singly deprotonated penta-acylated BN2 *E. coli* lipid A ( $M_r = 1587.0$  Da) using (A) CID and (B) UVPD. Glucosamine fragment ions are labeled as “ring cleavages.”

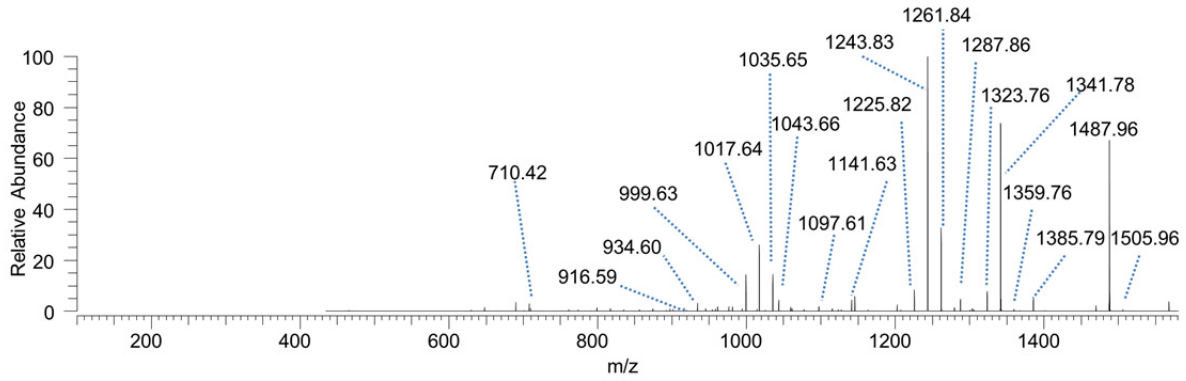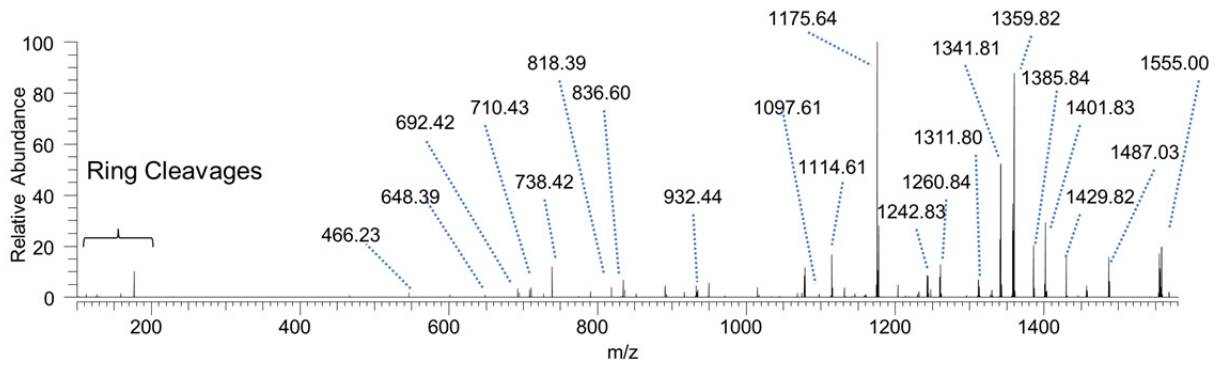



MS/MS fragmentation maps of doubly deprotonated BN2 *E. coli* lipid A ( $M_r = 1587.0$  Da) using (A) CID and (B) UVPD. Each cleavage site is numbered, and the  $m/z$  values of the fragment ions arising from each cleavage site are listed. Those fragment ions that require multiple cleavages are listed next to each cleavage site. Cleavages marked in red font are unique to UVPD. The companion MS/MS spectra are shown in Supplemental Figure 14.

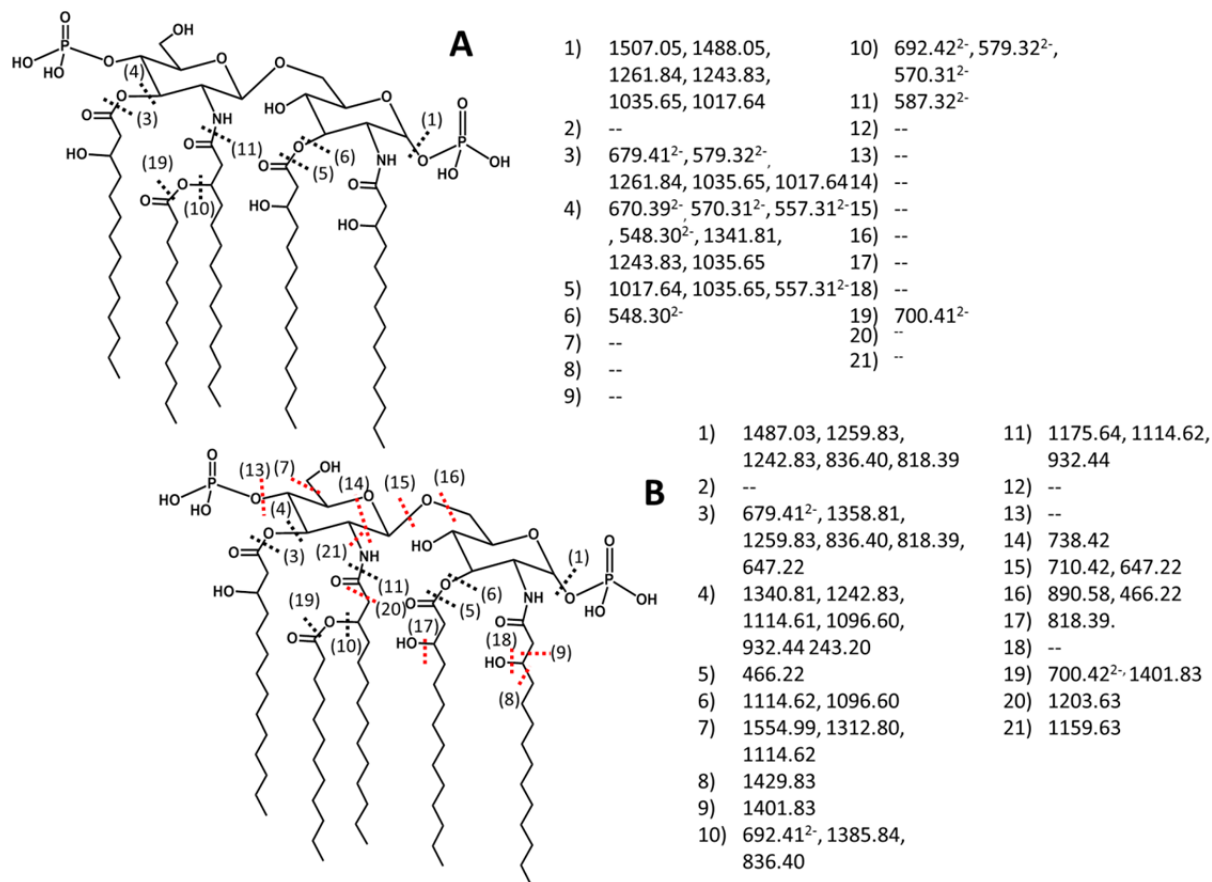

MS/MS fragmentation maps of singly deprotonated BN2 *E. coli* lipid A ( $M_r = 1587.0$  Da) using (A) CID and (B) UVPD. Each cleavage site is numbered, and the  $m/z$  values of the fragment ions arising from each cleavage site are listed. Those fragment ions that require multiple cleavages are listed next to each cleavage site. Cleavages marked in red font are unique to UVPD. The companion MS/MS spectra are shown in Supplemental Figure 15.

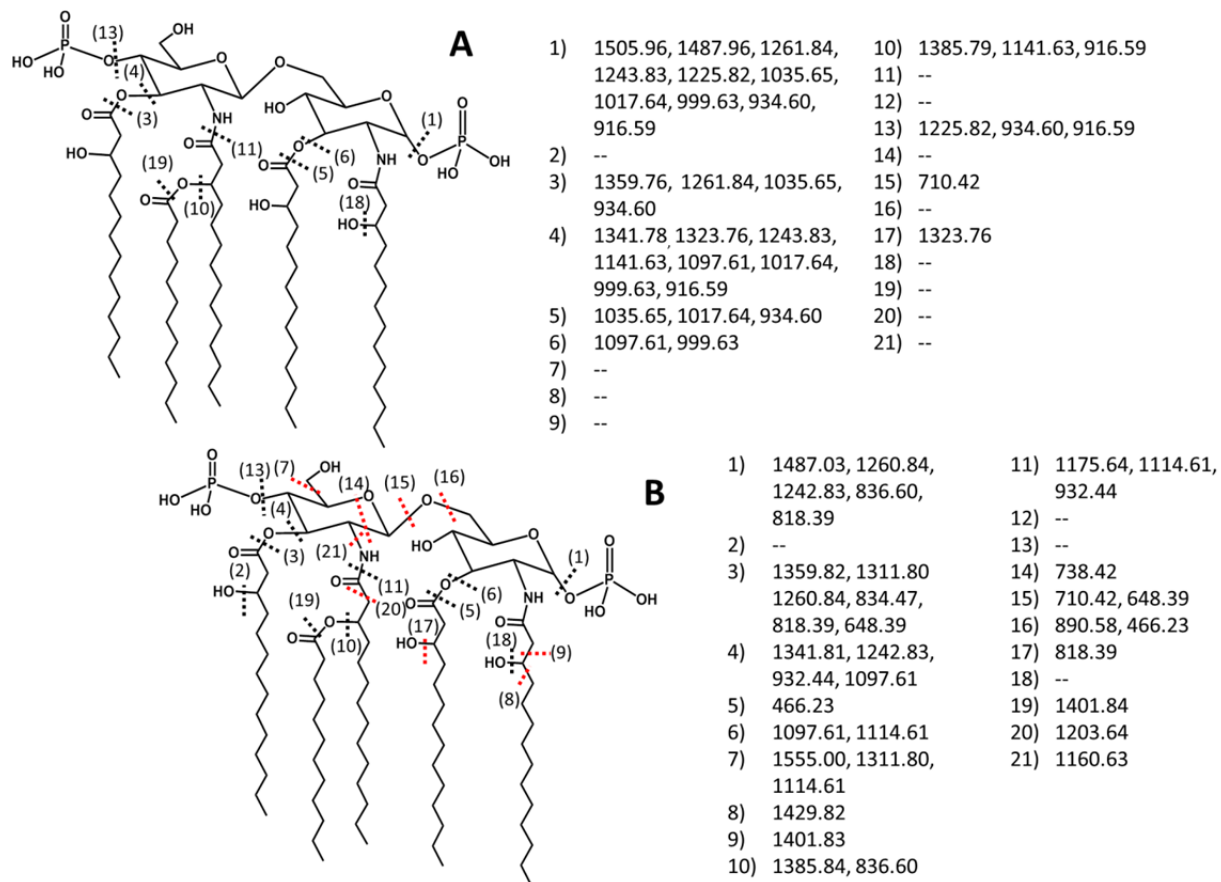

UVPD mass spectra of deprotonated BN2 lipid A modified with (A) LpxF+PagL ( $M_r = 1280.9$  Da), (B) PagL ( $M_r = 1360.8$  Da), (C) LpxF ( $M_r = 1507.1$  Da), (D) LpxF+PagL+PagP ( $M_r = 1519.1$  Da), (E) LpxF+PagP ( $M_r = 1745.3$  Da), and (F) PagP ( $M_r = 1825.3$  Da).

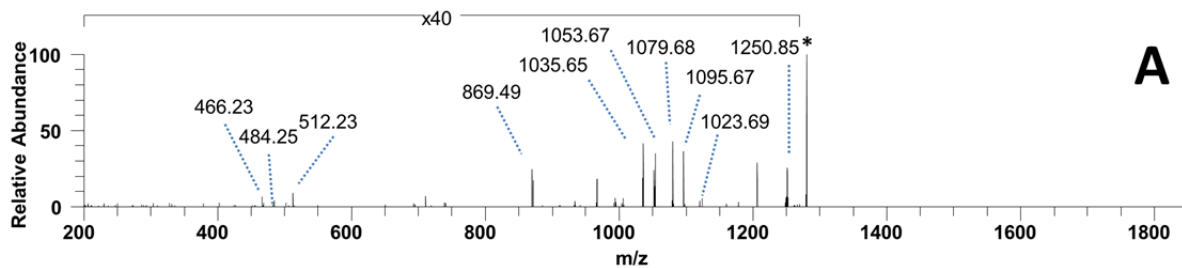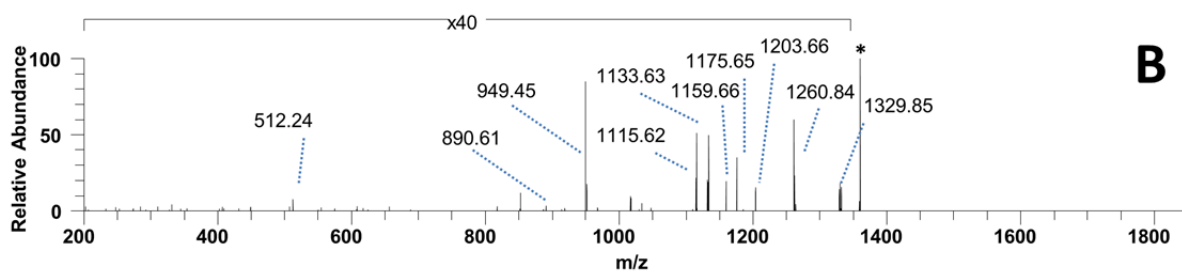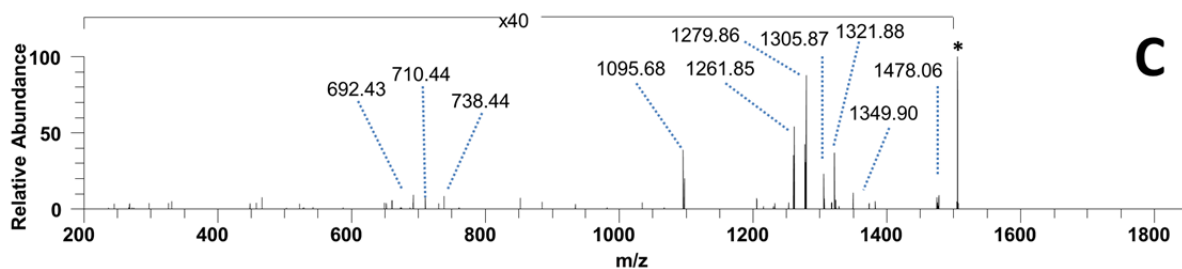

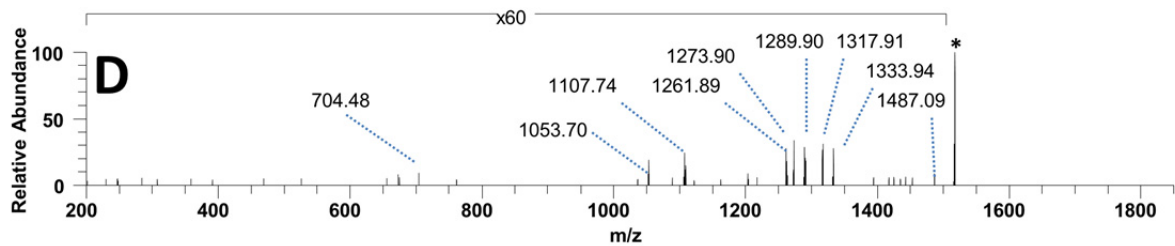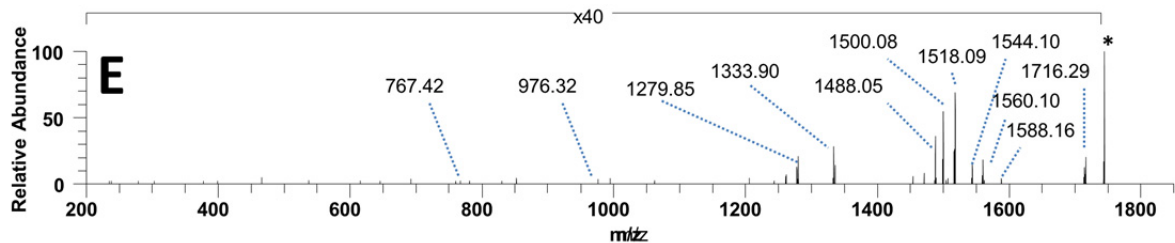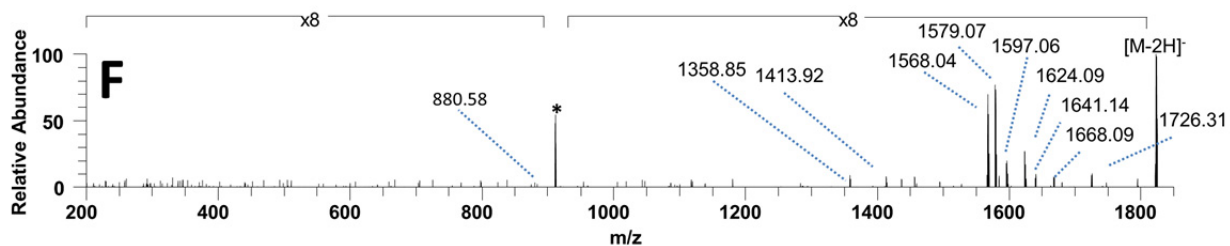

UVPD fragment ion cleavage maps for BN2 Lipid A modified with (A) LpxF+PagL ( $M_r = 1280.9$  Da), (B) PagL ( $M_r = 1360.8$  Da), (C) LpxF ( $M_r = 1507.1$  Da), (D) LpxF+PagL+PagP ( $M_r = 1519.1$  Da), (E) LpxF+PagP ( $M_r = 1745.3$  Da), and (F) PagP ( $M_r = 1825.3$  Da). The UVPD-MS spectra are shown in Supplemental Figure 19.

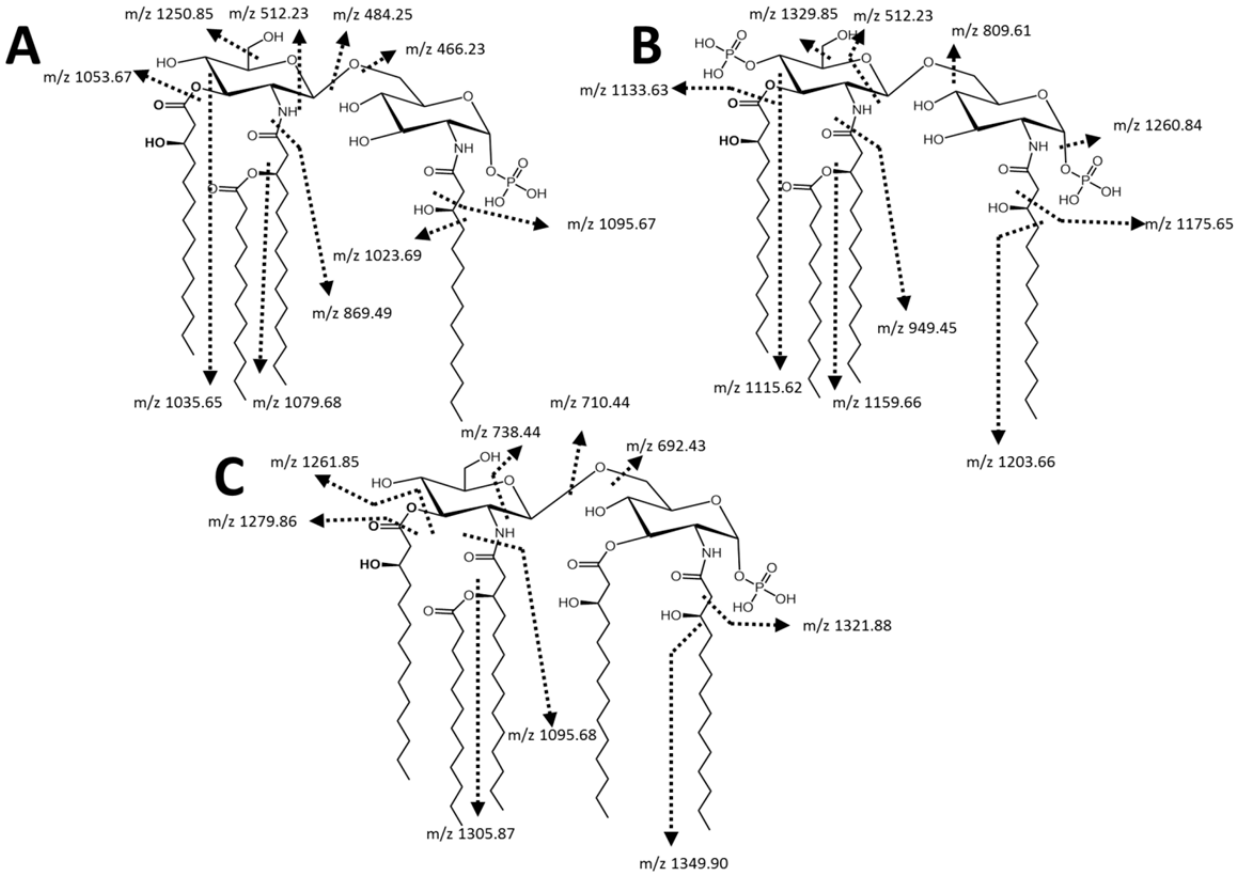

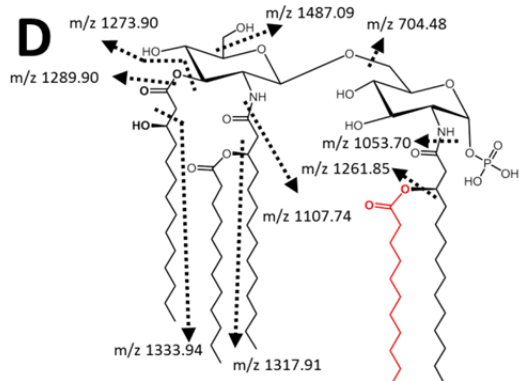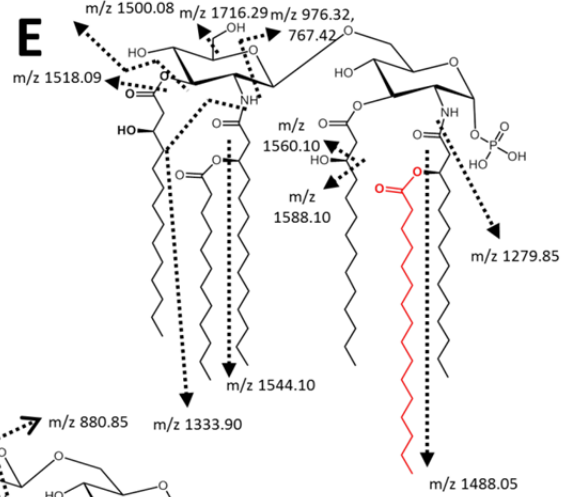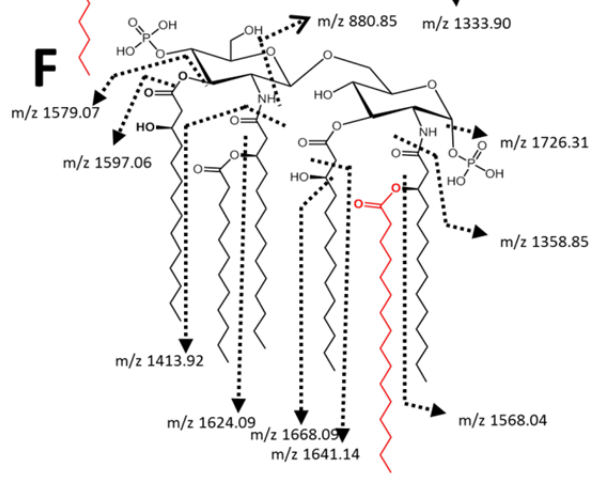

Supplemental Table 1. (Table S-1) CID, HCD and UVPD fragment ions of doubly deprotonated *E. coli* lipid A ( $M_r = 1797.2$ ). The spectra are shown in Figure 1 and fragmentation maps are shown in Figure 2.

| Cleavage                  | Theoretical m/z | Experimental m/z | Formula                                                                        | Error (ppm) | H Migration |
|---------------------------|-----------------|------------------|--------------------------------------------------------------------------------|-------------|-------------|
| <b>CID Fragment Ions</b>  |                 |                  |                                                                                |             |             |
| 1                         | 1717.253        | 1717.243         | C <sub>94</sub> H <sub>177</sub> N <sub>2</sub> O <sub>22</sub> P              | -5.8        |             |
| 2                         | 783.498         | 783.499          | C <sub>80</sub> H <sub>148</sub> N <sub>2</sub> O <sub>23</sub> P <sub>2</sub> | 1.3         |             |
| 2                         | 1568.003        | 1567.999         | C <sub>80</sub> H <sub>149</sub> N <sub>2</sub> O <sub>23</sub> P <sub>2</sub> | -2.6        |             |
| 3                         | 679.407         | 679.405          | C <sub>66</sub> H <sub>124</sub> N <sub>2</sub> O <sub>22</sub> P <sub>2</sub> | -2.9        |             |
| 4                         | 670.401         | 670.401          | C <sub>66</sub> H <sub>122</sub> N <sub>2</sub> O <sub>21</sub> P <sub>2</sub> | 0.0         |             |
| 1+2                       | 1488.037        | 1488.035         | C <sub>80</sub> H <sub>148</sub> N <sub>2</sub> O <sub>20</sub> P              | -1.3        |             |
| <b>HCD Fragment Ions</b>  |                 |                  |                                                                                |             |             |
| 1                         | 1717.253        | 1717.245         | C <sub>94</sub> H <sub>177</sub> N <sub>2</sub> O <sub>22</sub> P              | -4.7        |             |
| 2                         | 783.498         | 783.497          | C <sub>80</sub> H <sub>148</sub> N <sub>2</sub> O <sub>23</sub> P <sub>2</sub> | -1.3        |             |
| 2                         | 1568.003        | 1568.003         | C <sub>80</sub> H <sub>149</sub> N <sub>2</sub> O <sub>23</sub> P <sub>2</sub> | 0.0         |             |
| 2                         | 227.202         | 227.202          | C <sub>14</sub> H <sub>27</sub> O <sub>2</sub>                                 | 0.0         |             |
| 3                         | 679.407         | 679.406          | C <sub>66</sub> H <sub>124</sub> N <sub>2</sub> O <sub>22</sub> P <sub>2</sub> | -1.5        |             |
| 4                         | 670.402         | 670.401          | C <sub>66</sub> H <sub>122</sub> N <sub>2</sub> O <sub>21</sub> P <sub>2</sub> | -1.5        |             |
| 1+2                       | 1488.037        | 1488.043         | C <sub>80</sub> H <sub>148</sub> N <sub>2</sub> O <sub>20</sub> P              | 4.1         |             |
| 1+2+5                     | 1243.833        | 1243.831         | C <sub>66</sub> H <sub>120</sub> N <sub>2</sub> O <sub>17</sub> P              | -1.6        |             |
| 1+2+6                     | 1225.822        | 1225.820         | C <sub>66</sub> H <sub>118</sub> N <sub>2</sub> O <sub>16</sub> P              | -1.6        |             |
| 1+3+5                     | 1035.650        | 1035.646         | C <sub>52</sub> H <sub>96</sub> N <sub>2</sub> O <sub>16</sub> P               | -3.9        |             |
| 1+4+5                     | 1017.640        | 1017.638         | C <sub>52</sub> H <sub>94</sub> N <sub>2</sub> O <sub>15</sub> P               | -2.0        |             |
| <b>UVPD Fragment Ions</b> |                 |                  |                                                                                |             |             |
| 1                         | 1698.235        | 1697.218         | C <sub>94</sub> H <sub>174</sub> N <sub>2</sub> O <sub>21</sub> P              | -5.4        | -H          |
| 2                         | 1568.003        | 1569.000         | C <sub>80</sub> H <sub>149</sub> N <sub>2</sub> O <sub>23</sub> P <sub>2</sub> | -6.9        | +H          |
| 2                         | 783.498         | 783.494          | C <sub>80</sub> H <sub>148</sub> N <sub>2</sub> O <sub>23</sub> P <sub>2</sub> | -5.1        |             |
| 2                         | 227.202         | 227.201          | C <sub>14</sub> H <sub>27</sub> O <sub>2</sub>                                 | -4.4        |             |
| 3                         | 1359.821        | 1357.801         | C <sub>66</sub> H <sub>125</sub> N <sub>2</sub> O <sub>22</sub> P <sub>2</sub> | -2.9        | -2H         |
| 4                         | 1341.810        | 1340.798         | C <sub>66</sub> H <sub>123</sub> N <sub>2</sub> O <sub>21</sub> P <sub>2</sub> | -3.1        | -H          |
| 6                         | 1552.008        | 1550.997         | C <sub>80</sub> H <sub>149</sub> N <sub>2</sub> O <sub>22</sub> P <sub>2</sub> | -2.1        | -H          |
| 7                         | 1765.193        | 1765.191         | C <sub>93</sub> H <sub>174</sub> N <sub>2</sub> O <sub>24</sub> P <sub>2</sub> | -1.1        |             |
| 8                         | 1640.024        | 1640.017         | C <sub>83</sub> H <sub>153</sub> N <sub>2</sub> O <sub>25</sub> P <sub>2</sub> | -4.3        |             |
| 9                         | 1612.029        | 1612.020         | C <sub>82</sub> H <sub>153</sub> N <sub>2</sub> O <sub>24</sub> P <sub>2</sub> | -5.6        |             |
| 10                        | 1596.035        | 1596.025         | C <sub>82</sub> H <sub>153</sub> N <sub>2</sub> O <sub>23</sub> P <sub>2</sub> | -6.3        |             |
| 11                        | 1387.852        | 1386.833         | C <sub>68</sub> H <sub>129</sub> N <sub>2</sub> O <sub>22</sub> P <sub>2</sub> | -8.1        | -H          |
| 12                        | 1583.998        | 1584.999         | C <sub>80</sub> H <sub>149</sub> N <sub>2</sub> O <sub>24</sub> P <sub>2</sub> | -4.3        | +H          |
| 14                        | 738.420         | 738.420          | C <sub>35</sub> H <sub>65</sub> NO <sub>13</sub> P                             | 0.0         |             |
| 15                        | 710.425         | 710.422          | C <sub>34</sub> H <sub>65</sub> NO <sub>12</sub> P                             | -4.2        |             |
| 16                        | 1100.775        | 1100.771         | C <sub>60</sub> H <sub>111</sub> NO <sub>14</sub> P                            | -3.6        |             |
| 16                        | 692.414         | 692.412          | C <sub>34</sub> H <sub>63</sub> NO <sub>11</sub> P                             | -2.9        |             |
| 1+3+5+10+17               | 817.462         | 818.420          | C <sub>40</sub> H <sub>70</sub> N <sub>2</sub> O <sub>13</sub> P               | -61.0       |             |
| 1+3+5+10                  | 836.480         | 836.393          | C <sub>40</sub> H <sub>73</sub> N <sub>2</sub> O <sub>14</sub> P               | -104.0      |             |
| 4+11                      | 932.442         | 932.437          | C <sub>40</sub> H <sub>74</sub> N <sub>2</sub> O <sub>18</sub> P <sub>2</sub>  | -5.4        |             |
| 7+11+6                    | 1114.645        | 1114.605         | C <sub>53</sub> H <sub>100</sub> N <sub>2</sub> O <sub>18</sub> P <sub>2</sub> | -35.9       |             |
| 1+2+5                     | 1243.833        | 1242.818         | C <sub>66</sub> H <sub>120</sub> N <sub>2</sub> O <sub>17</sub> P              | -5.8        | -H          |
| 1+2+6                     | 1225.822        | 1224.763         | C <sub>66</sub> H <sub>118</sub> N <sub>2</sub> O <sub>16</sub> P              | -41.8       | -H          |
| 1+2                       | 1470.026        | 1470.003         | C <sub>80</sub> H <sub>146</sub> N <sub>2</sub> O <sub>19</sub> P              | -15.6       |             |

Supplemental Table 2. (Table S-2) UVPD fragment ions of singly deprotonated BN2 penta-acyl *E. coli* lipid A ( $M_r = 1587.0$  Da) . The spectrum is shown in Supplemental Figure 15B and fragmentation map is shown in Supplemental Figure 16B.

| Cleavage | Theoretical m/z | Experimental m/z | Formula                                                                        | Error (ppm) | H Migration |
|----------|-----------------|------------------|--------------------------------------------------------------------------------|-------------|-------------|
| 1        | 1488.037        | 1487.027         | C <sub>80</sub> H <sub>148</sub> N <sub>2</sub> O <sub>2</sub> OP              | -1.5        | -H          |
| 3        | 1359.821        | 1359.823         | C <sub>66</sub> H <sub>125</sub> N <sub>2</sub> O <sub>22</sub> P <sub>2</sub> | 1.5         |             |
| 4        | 1341.81         | 1341.813         | C <sub>66</sub> H <sub>123</sub> N <sub>2</sub> O <sub>21</sub> P <sub>2</sub> | 2.2         |             |
| 6        | 1097.6061       | 1097.613         | C <sub>52</sub> H <sub>95</sub> N <sub>2</sub> O <sub>18</sub> P <sub>2</sub>  | 6.3         | +H          |
| 7        | 1554.996        | 1554.995         | C <sub>79</sub> H <sub>148</sub> N <sub>2</sub> O <sub>23</sub> P <sub>2</sub> | -0.6        |             |
| 8        | 1429.826        | 1429.824         | C <sub>69</sub> H <sub>127</sub> N <sub>2</sub> O <sub>24</sub> P <sub>2</sub> | -1.4        |             |
| 9        | 1401.831        | 1401.832         | C <sub>68</sub> H <sub>127</sub> N <sub>2</sub> O <sub>23</sub> P <sub>2</sub> | 0.7         |             |
| 10       | 1385.836        | 1385.838         | C <sub>68</sub> H <sub>127</sub> N <sub>2</sub> O <sub>22</sub> P <sub>2</sub> | 1.4         |             |
| 11       | 1175.638        | 1175.639         | C <sub>54</sub> H <sub>101</sub> N <sub>2</sub> O <sub>21</sub> P <sub>2</sub> | 0.9         |             |
| 14       | 738.417         | 738.421          | C <sub>35</sub> H <sub>65</sub> NO <sub>13</sub> P                             | 5.4         |             |
| 15       | 710.425         | 710.432          | C <sub>34</sub> H <sub>65</sub> NO <sub>12</sub> P                             | 9.9         |             |
| 16       | 890.576         | 890.58           | C <sub>46</sub> H <sub>85</sub> NO <sub>13</sub> P                             | 4.5         |             |
| 19       | 1401.831        | 1401.832         | C <sub>68</sub> H <sub>127</sub> N <sub>2</sub> O <sub>23</sub> P <sub>2</sub> | 0.7         |             |
| 20       | 1203.633        | 1203.636         | C <sub>65</sub> H <sub>101</sub> N <sub>2</sub> O <sub>22</sub> P <sub>2</sub> | 2.5         |             |
| 21       | 1160.627        | 1160.625         | C <sub>54</sub> H <sub>100</sub> NO <sub>21</sub> P <sub>2</sub>               | -1.7        |             |
| 5+16     | 466.221         | 466.226          | C <sub>20</sub> H <sub>37</sub> NO <sub>9</sub> P                              | 10.7        |             |
| 3+15     | 648.388         | 648.392          | C <sub>32</sub> H <sub>59</sub> NO <sub>10</sub> P                             | 6.2         |             |
| 1+3+5+17 | 817.462         | 818.391          | C <sub>40</sub> H <sub>70</sub> N <sub>2</sub> O <sub>13</sub> P               | -96.3       | +H          |
| 4+11     | 932.442         | 932.445          | C <sub>40</sub> H <sub>74</sub> N <sub>2</sub> O <sub>18</sub> P <sub>2</sub>  | 3.2         |             |
| 6+7+11   | 1114.645        | 1114.610         | C <sub>53</sub> H <sub>100</sub> N <sub>2</sub> O <sub>18</sub> P <sub>2</sub> | -31.4       |             |
| 1+3      | 1260.835        | 1260.836         | C <sub>66</sub> H <sub>121</sub> N <sub>2</sub> O <sub>18</sub> P              | 0.8         |             |
| 1+4      | 1243.833        | 1242.827         | C <sub>66</sub> H <sub>120</sub> N <sub>2</sub> O <sub>17</sub> P              | 1.4         | -H          |
| 4+7      | 1310.791        | 1311.800         | C <sub>65</sub> H <sub>120</sub> N <sub>2</sub> O <sub>20</sub> P <sub>2</sub> | 0.9         | +H          |
